# Supplementary material for: Chromatin acetylation at transcription start sites and vitamin D receptor binding regions relates to effects of 1α,25-dihydroxyvitamin D3 and histone deacetylase inhibitors on gene expression
Source: PubMed Central journal article supplement — Nucleic Acids Res. 2012 Oct 23;41(1):110–24. doi: 10.1093/nar/gks959 (PMC3592476; doi:10.1093/nar/gks959), 2012-10-23

## SUPPLEMENTARY MATERIAL

## SUPPLEMENTARY TABLES

Table S1: qPCR primers.

| Gene             | Fragment size<br>(bp) | Annealing<br>temperature (°C) | Primer sequences (5'-3')                          |
|------------------|-----------------------|-------------------------------|---------------------------------------------------|
| <i>B2M</i>       | 246                   | 60                            | GGCTATCCAGCGTACTCCAAA<br>CGGCAGGCATACTCATCTTTTT   |
| <i>CAMP</i>      | 135                   | 60                            | CAGCAGTCACCAGAGGATTGT<br>CAGCAGGGCAAATCTCTTGTTA   |
| <i>CD93</i>      | 234                   | 60                            | CCTCCCCAAGTGGTCTGAG<br>TGAGTCTCGTCCTTGTCACCT      |
| <i>CDKN2D</i>    | 202                   | 60                            | CTTCCAATCCATCTGGCAGT<br>CTCTTGCTGGAGAGGGTGAC      |
| <i>DUSP10</i>    | 183                   | 60                            | GCGGCAGTACTTTGAAGAGG<br>ATTGGTCGTTTGCCTTTGAC      |
| <i>GAPDH</i>     | 113                   | 60                            | CATGAGAAGTATGACAACAGCCT<br>AGTCCTTCCACGATACCAAAGT |
| <i>GZF1</i>      | 212                   | 60                            | TGTCTGTGATGAATGTGGTGCAA<br>GTGAATTCCGCTGGGCAAAAG  |
| <i>EP300</i>     | 217                   | 60                            | GCAGCATATGCTCCCAAATC<br>AGCTACCAGTCCAGGATG        |
| <i>HBEGF</i>     | 175                   | 60                            | CAAGGAGGAGCACGGGAAAAG<br>CCCATGACACCTCTCTCCA      |
| <i>HPRT1</i>     | 94                    | 60                            | TGACACTGGCAAAACAATGCA<br>GGTCCTTTTACCAGCAAGCT     |
| <i>LOC200261</i> | 140                   | 60                            | TCTCATCAGTAACCCAGGAGG<br>CCCACCAAAAGGGACACCAT     |
| <i>NAPB</i>      | 225                   | 60                            | GCCACTTCATAGTAGACGAGTTG<br>TGGACTTTTTGATGCGAAGCA  |
| <i>NFKB1A</i>    | 227                   | 60                            | GCAAAATCCTGACCTGGTGT<br>GCTCGTCCTCTGTGAACTCC      |
| <i>NXT1</i>      | 91                    | 60                            | CTTCCAGCGAGTTCCAAATCA<br>CAGATGACAACAAGGACCGTG    |
| <i>SSTR4</i>     | 174                   | 64                            | CGTGGTCGTCTTTGTGCTCT<br>AAGAATCGGCGGAAGTTGT       |
| <i>THBD</i>      | 107                   | 60                            | GACCTTCCTCAATGCCAGTCA<br>CGTCGCCGTTCAGTAGCAA      |
| <i>VDR</i>       | 332                   | 60                            | AGATGACCCTTCTGTGACCC<br>AGCTTCTTCAGTCCCACCTG      |

**Table S2: Genomic primers.**

| Genomic region | Fragment size (bp) | Annealing temperature (°C) | Primer sequences (5'-3')     |
|----------------|--------------------|----------------------------|------------------------------|
| <i>CAMP</i>    | 347                | 65                         | AGCAAGTCCTGTGAAGCAATAGC      |
| TSS            |                    |                            | CAGGAGGCGGTAGAGGTTAGCATC     |
| <i>CAMP</i>    | 224                | 65                         | ACAACCTTTCCTAAGACTTGGCTTG    |
| VDR site       |                    |                            | CCCAACCTAGAGACTCACTCTTGC     |
| <i>DUSP10</i>  | 217                | 65                         | AGCTTCGGATAAACCCCTCCTTAAA    |
| TSS            |                    |                            | TTGATCTCCAGCAGCAACATAGTTA    |
| <i>DUSP10</i>  | 250                | 65                         | GTCAACCCTTTGAGCCGGAGTTAAG    |
| VDR site       |                    |                            | GGAGATCATGAAACCCATTGTCCAG    |
| <i>NFKB1A</i>  | 235                | 65                         | AAATCCCCAGCCAGCGTTTATAG      |
| TSS            |                    |                            | GTCCAGTAGCCGCTCCTTCTTC       |
| <i>NXT1</i>    | 225                | 65                         | CTACCGCCTCTTATAAGCCACACAT    |
| TSS            |                    |                            | CTCCTCCTTCTTGGAGGCTTACTCT    |
| <i>NXT1</i>    | 153                | 65                         | TGAGGTCAAGGGTCCATTCTGATGGC   |
| VDR site       |                    |                            | ACTTCCTGACCCAAGCATGAATCCCCCT |
| <i>PSMA6</i>   | 100                | 65                         | GTTGGGAATTTTCCATCTTGCTCT     |
| VDR site       |                    |                            | CTCGCTGACCTGCAGGAAACTC       |
| <i>THBD</i>    | 140                | 65                         | CACCAGGCACTTCCTTCCTTTTC      |
| TSS            |                    |                            | GTCCCAGCCCAGACACTTCTTG       |

**Table S3: Microarray results.** Genes that had been also studied by qPCR are indicated in red.

### SUPPLEMENTARY FIGURE LEGENDS

**Figure S1: Basal mRNA expression of the genes within the *THBD* locus.** qPCR was used to determine the basal expression of the seven genes within the *THBD* locus (Fig. 1) in relation to the reference genes *B2M*, *GAPDH* and *HPRT1* in untreated THP-1 cells. A representative of at least three independent experiments, each performed in triplicate individual cell treatments, is shown. The data points represent the means of three cell treatments and the bars indicate standard deviations.

**Figure S2: Effects of  $1\alpha,25(\text{OH})_2\text{D}_3$  on mRNA expression of reference genes.** qPCR was performed to determine the relative changes of mRNA expression of the VDR target genes *DUSP10*, *NFKBIA*, *CAMP* and *HBEGF* and the negative control genes *CDKN2D*, *VDR* and *EP300* in relation to the reference genes *B2M*, *GAPDH* and *HPRT1* in THP-1 cells in response to incubation with 100 nM  $1\alpha,25(\text{OH})_2\text{D}_3$  for the indicated times. The columns represent the means of three cell treatments and the bars indicate standard deviations. Two-tailed Student's t-tests were performed to determine the significance of the mRNA induction by  $1\alpha,25(\text{OH})_2\text{D}_3$  in reference to solvent-treated cells (\*  $p < 0.05$ ; \*\*  $p < 0.01$ ; \*\*\*  $p < 0.001$ ).

**Figure S3: Confirming VDR target genes by siRNA-mediated knock-down.** THP-1 cells were transfected with 200 pmol of a mixture of three siRNA oligonucleotides directed against VDR and after 43 h incubated with solvent (EtOH) or 100 nM  $1\alpha,25(\text{OH})_2\text{D}_3$  for 5 h. qPCR was performed to determine the reduction of the respective mRNA levels normalized by the three reference genes *B2M*, *GAPDH* and *HPRT1*. A representative of at least three independent experiments, each performed in triplicate individual cell treatments, is shown. The columns represent the means of three cell treatments and the bars indicate standard deviations. Two-tailed Student's t-tests were performed to determine the significance of the mRNA reduction by the VDR knock-down and the induction by  $1\alpha,25(\text{OH})_2\text{D}_3$  (red stars) in

reference to control siRNA-transfected cells and solvent-treated cells, respectively (\*  $p < 0.05$ ; \*\*  $p < 0.01$ ; \*\*\*  $p < 0.001$ ).

**Figure S4: Effects of HDAC inhibition on mRNA expression of reference genes.** qPCR was performed to determine the relative changes of mRNA expression of the VDR target genes *DUSP10*, *NFKBIA*, *CAMP* and *HBEGF* and the negative control genes *CDKN2D*, *VDR* and *EP300* in relation to the reference genes *B2M*, *GAPDH* and *HPRT1* in THP-1 cells in response to incubation with 300 nM TsA for the indicated times. The columns represent the means of three cell treatments and the bars indicate standard deviations. Two-tailed Student's t-tests were performed to determine the significance of the mRNA induction by TsA in reference to solvent-treated cells (\*  $p < 0.05$ ; \*\*  $p < 0.01$ ; \*\*\*  $p < 0.001$ ).

**Figure S5: TsA dose response.** qPCR was performed to determine the relative changes of mRNA expression of 12 selected genes normalized by the three reference genes *B2M*, *GAPDH* and *HPRT1* in THP-1 cells in response to incubation with the indicated concentrations of TsA for 90 min. The columns represent the means of three cell treatments and the bars indicate standard deviations. Two-tailed Student's t-tests were performed to determine the significance of the mRNA induction by TsA in reference to solvent-treated cells (\*  $p < 0.05$ ; \*\*  $p < 0.01$ ; \*\*\*  $p < 0.001$ ).

**Figure S6: Microarray analysis of TsA-treated THP-1 cells.** The Venn diagram indicates the number of genes that responded after 90 and 150 min to a treatment with 300 nM TsA. For the sake of clarity, the sizes and overlaps of the circles are only approximate.

**Figure S7: Early time course expression profiling of six representative genes.** qPCR was performed to determine the relative changes of mRNA expression of selected genes normalized by the three reference genes *B2M*, *GAPDH* and *HPRT1* in THP-1 cells in

response to incubation with 100 nM  $1\alpha,25(\text{OH})_2\text{D}_3$  and 300 nM TsA, alone or in combination, over a time period of 150 min. A representative of at least three independent experiments, each performed in triplicate individual cell treatments, is shown. The data points represent the means of three cell treatments and the bars indicate standard deviations. Two-tailed Student's t-tests were performed to determine the significance of the mRNA induction by the stimuli in reference to solvent-treated cells (\*  $p < 0.05$ ; \*\*  $p < 0.01$ ; \*\*\*  $p < 0.001$ ).

**Figure S8: Microarray analysis of  $1\alpha,25(\text{OH})_2\text{D}_3$ - and TsA-treated THP-1 cells.** The Venn diagrams indicate the number of genes regulated in THP-1 cells that were treated for 150 min with 100 nM  $1\alpha,25(\text{OH})_2\text{D}_3$  and 300 nM TsA, alone and in combination. For the sake of clarity, the sizes and overlaps of the circles are only approximate.

Fig. S1

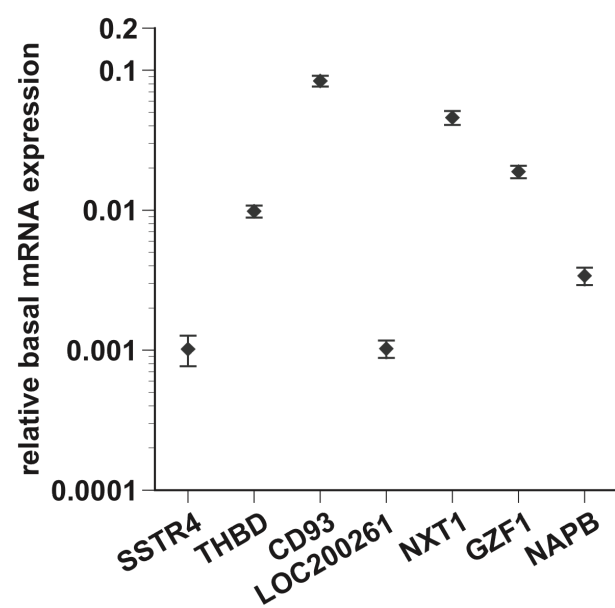

Fig. S2

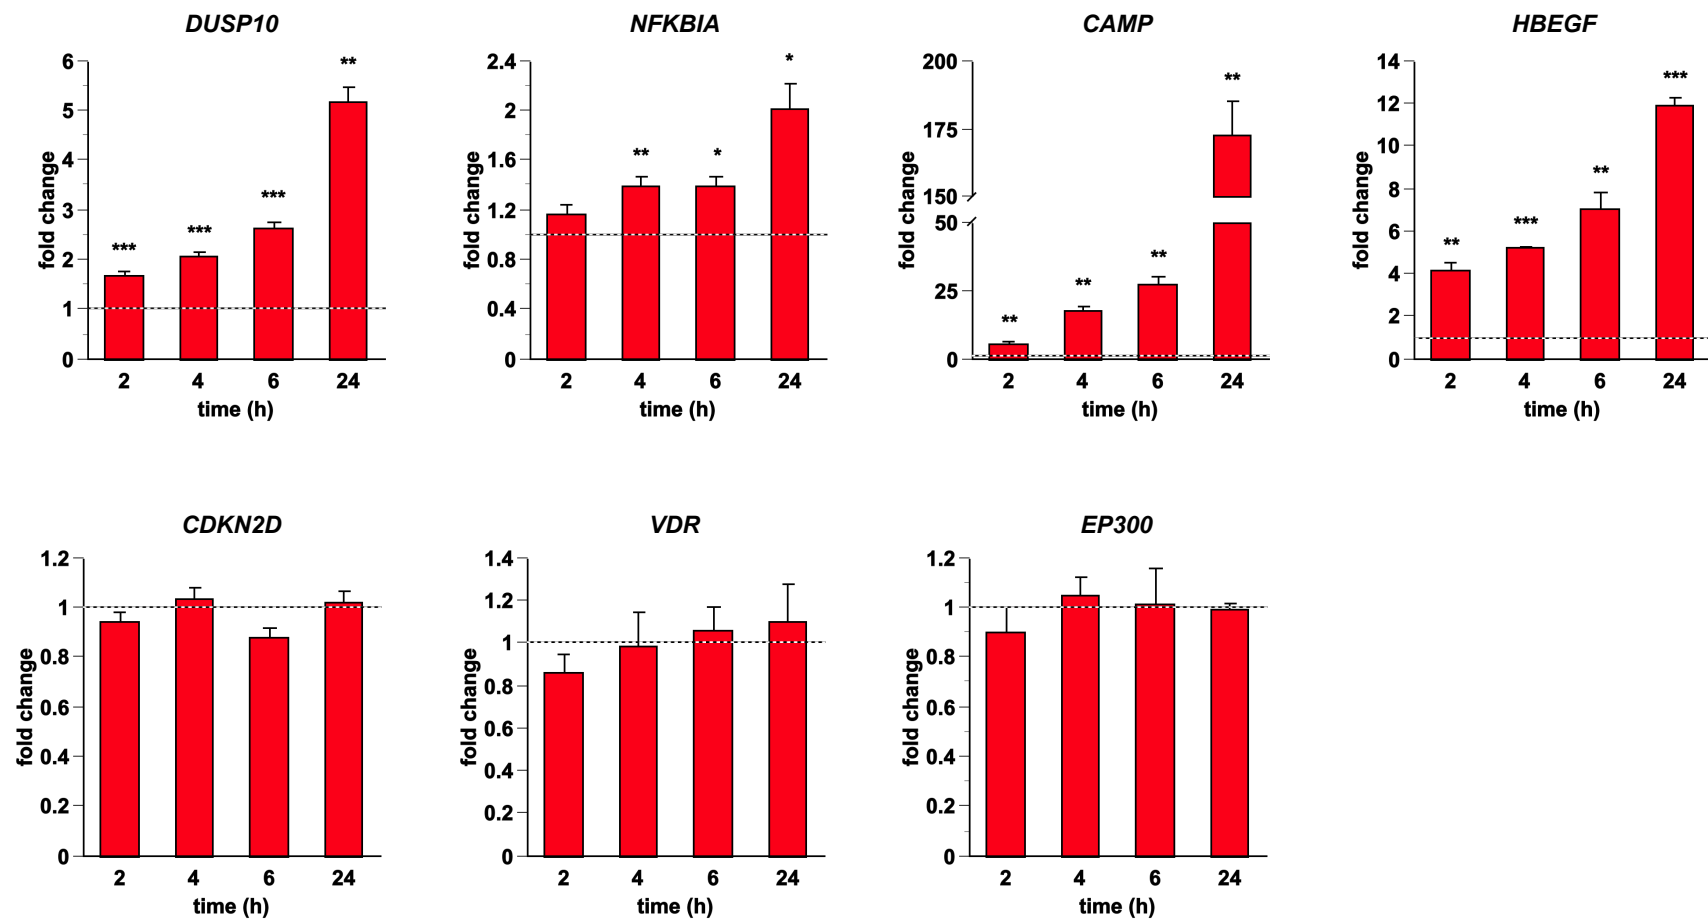

**Fig. S3**

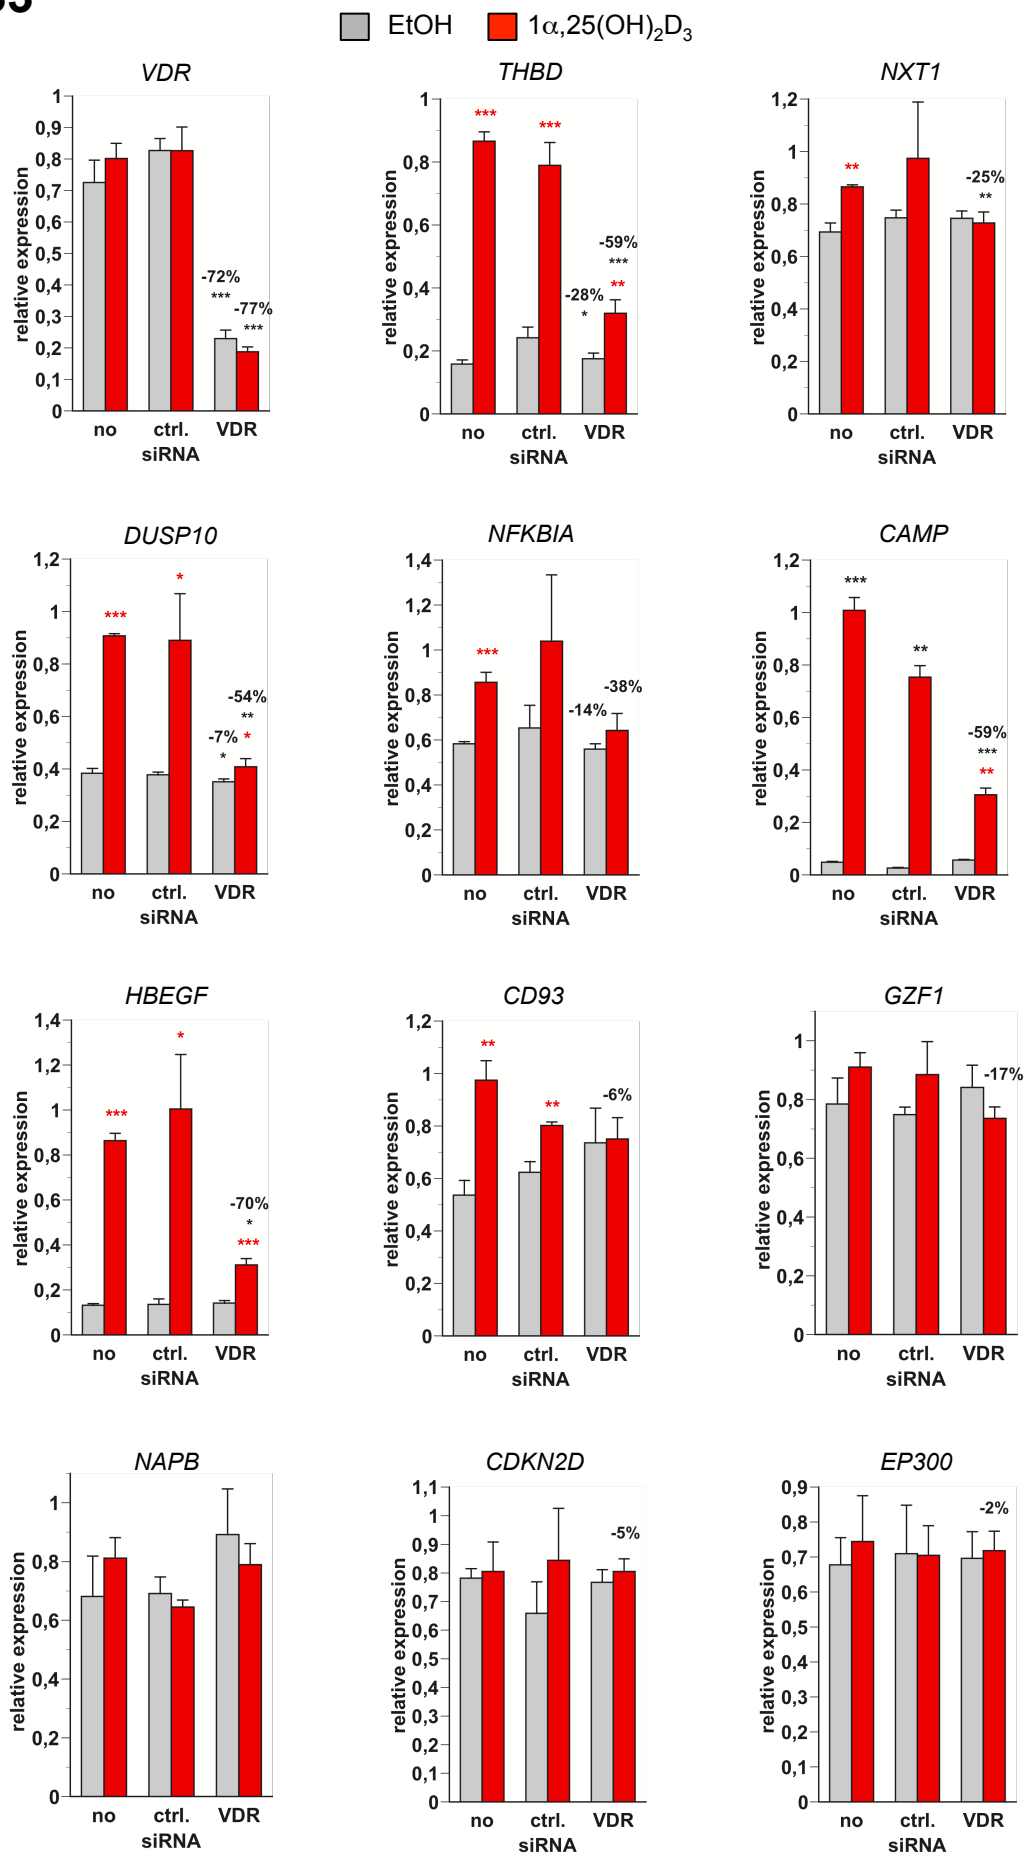

red stars = significance of ligand treatment effect (vs solvent), black stars = significance of knock-down

Fig. S4

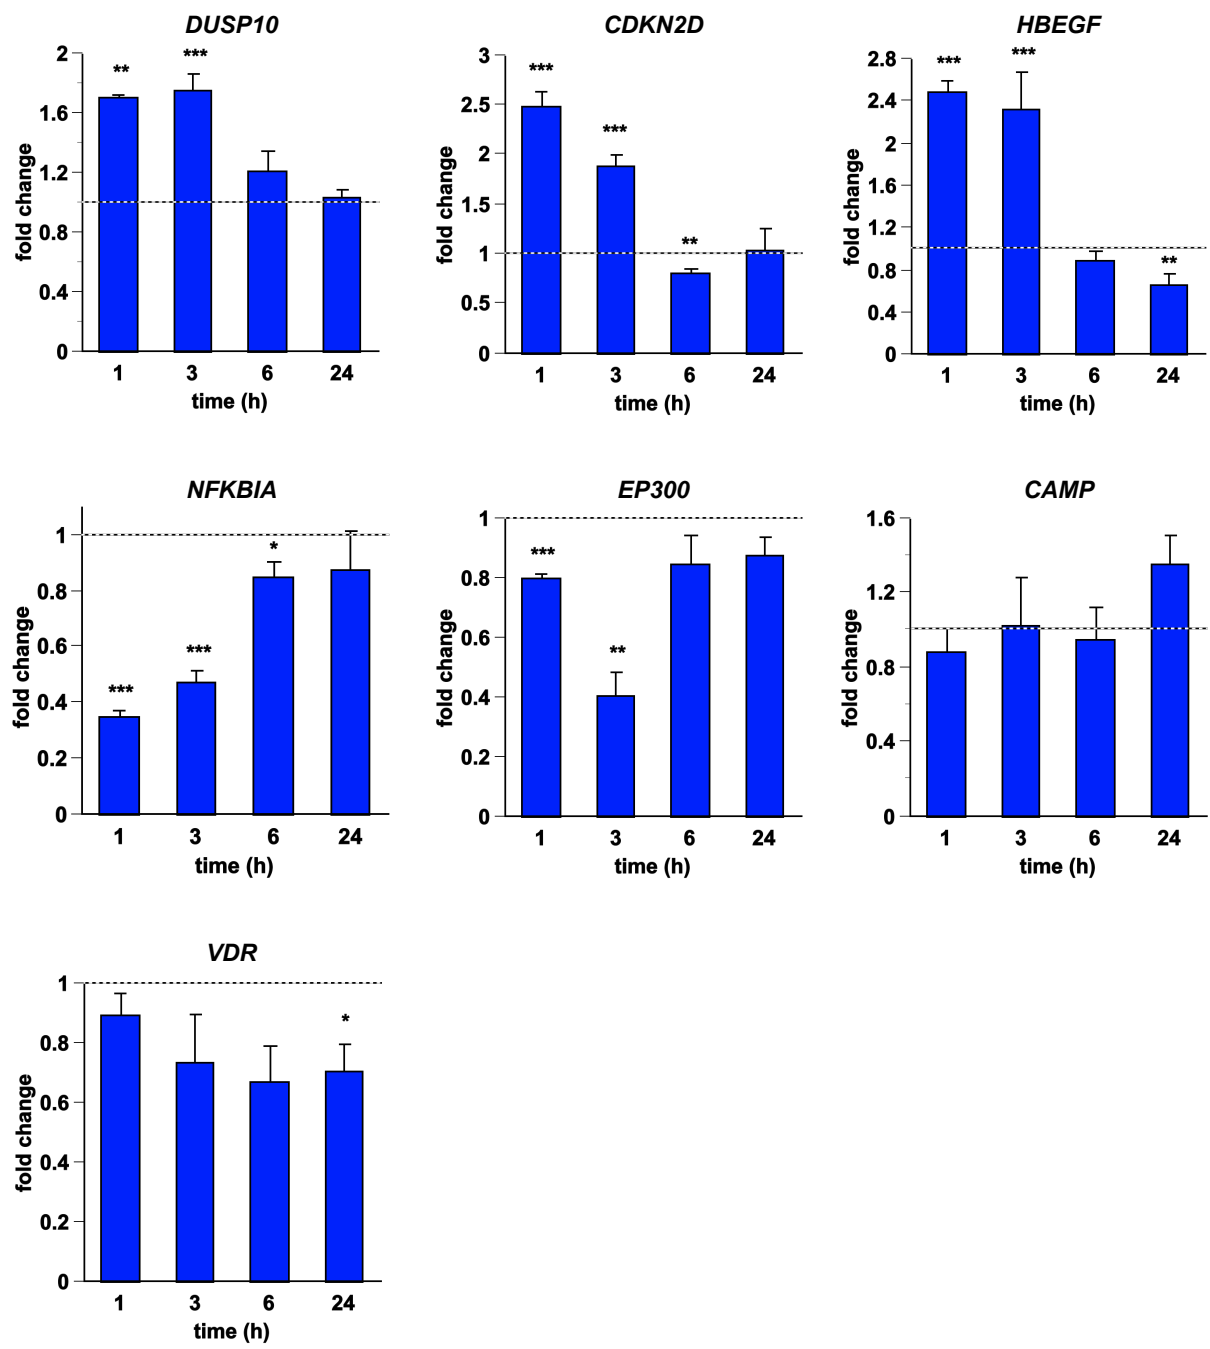

**Fig. S5**

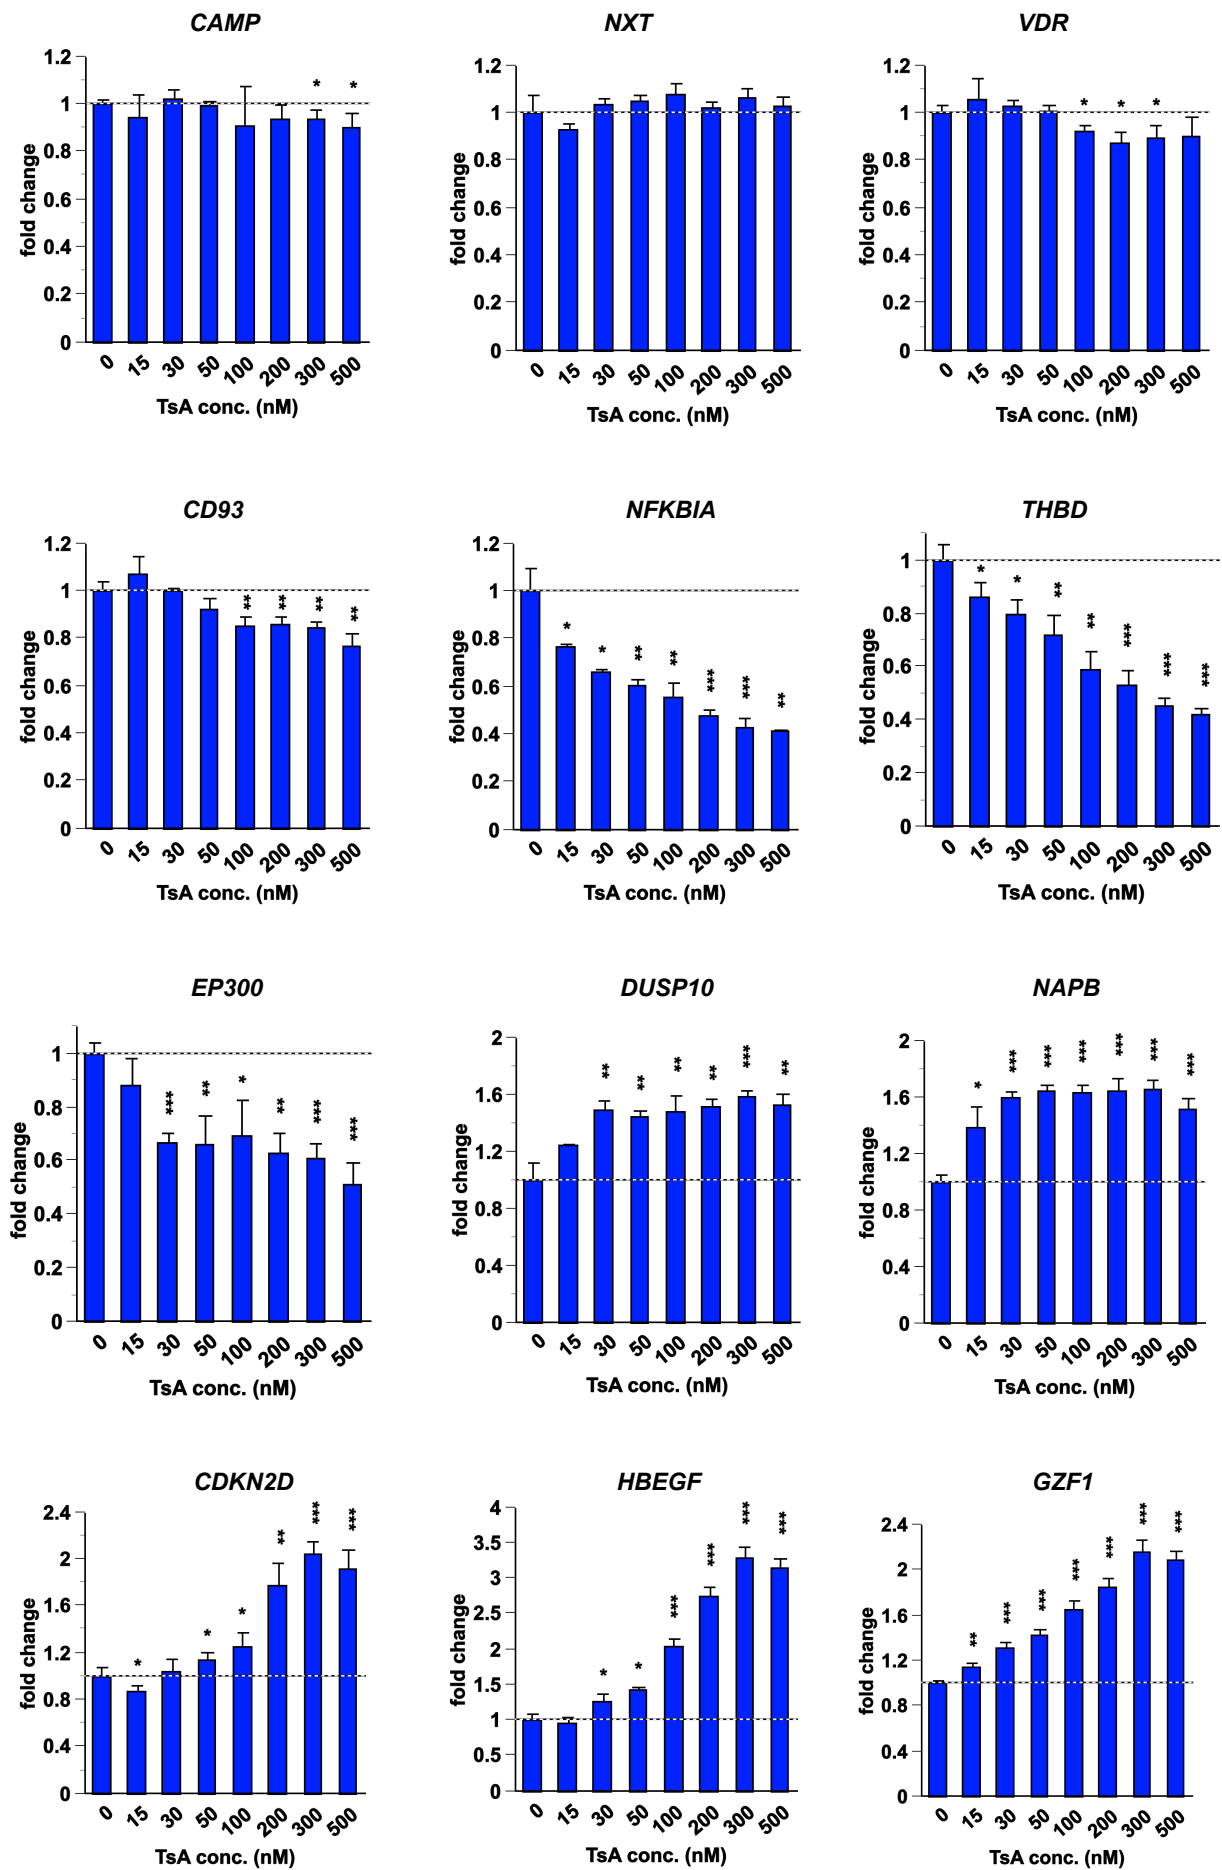

**Fig. S6**

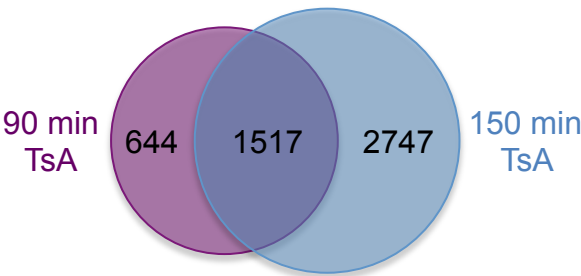

Fig. S7

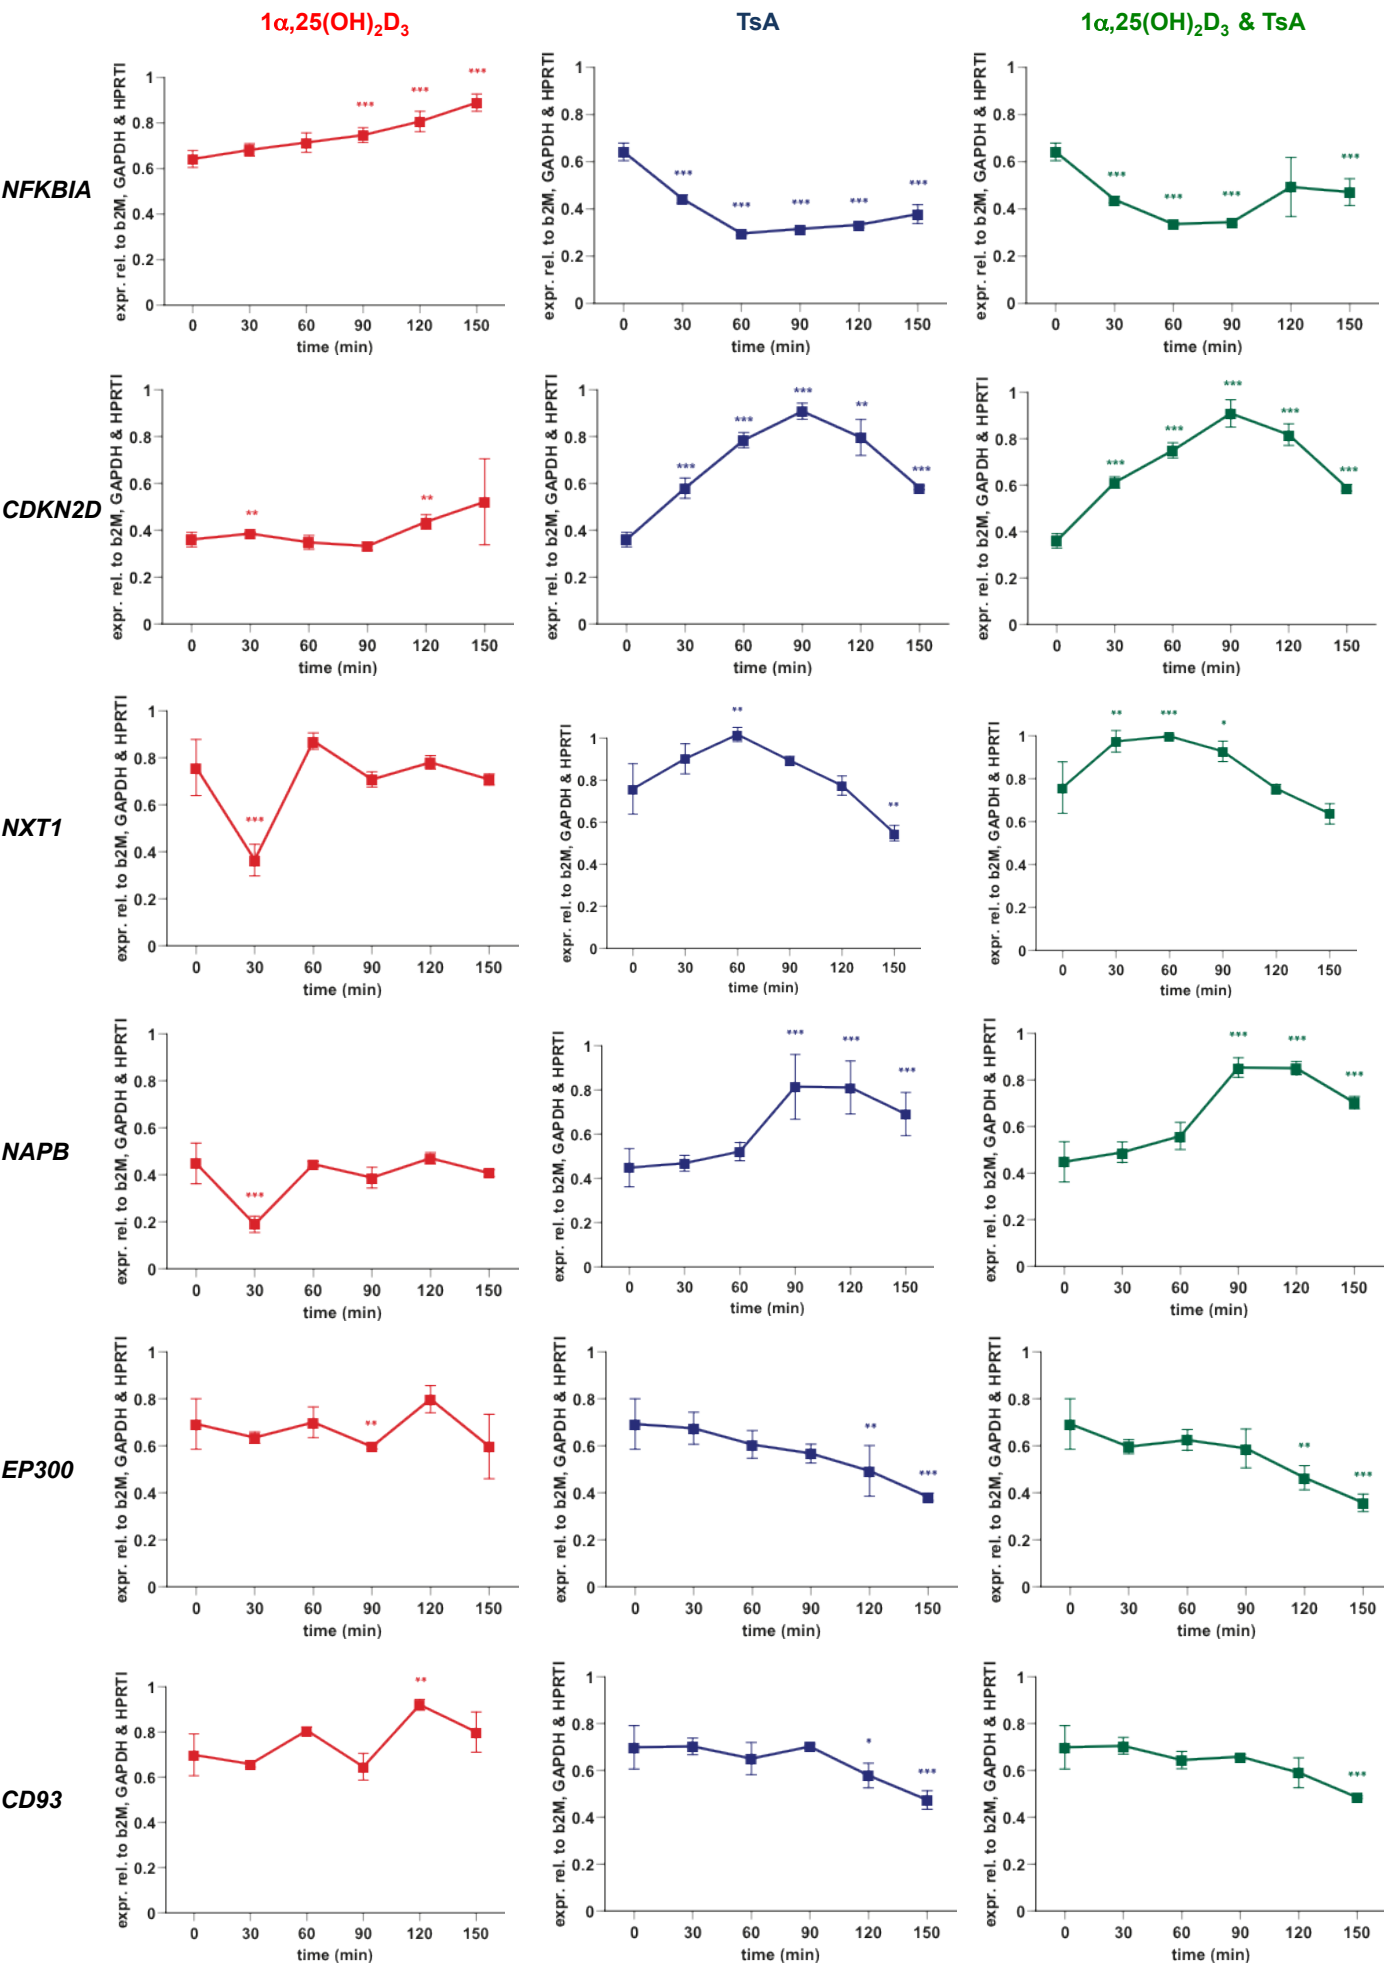

**Fig. S8**

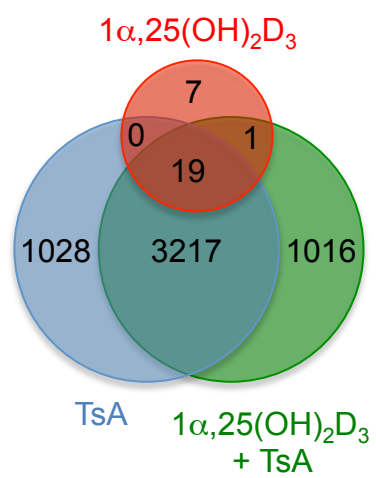

Supplement: supp_gks959_nar-01501-x-2012-File008.pdf [file supp_gks959_nar-01501-x-2012-File008.pdf]
